# Supplementary material for: Cerebral mGluR5 availability contributes to elevated sleep need and behavioral adjustment after sleep deprivation
Source: eLife. 2017 Oct 5;6:e28751. doi: 10.7554/eLife.28751 (PMC5644949; doi:10.7554/eLife.28751)
Supplement: Figure 5—source data 1. [file elife-28751-fig5-data1.xlsx]

## Sheet: Sheet1
Grm5 mRNA expression
Cortex
	SC Cortex mean	SC Cortex St.Dev	SD Cortex mean	SD Cortex St.Dev.		data points sleep control (SC)			data points sleep deprivation (SD)
WT	7.55	0.7976	6.2067	1.6657	WT	8.2	7.79	6.66	7.51	4.33	6.78
HT	4.98	0.6681	3.3933	0.4302	HT	4.38	5.7	4.86	3.83	3.38	2.97
KO	0.0652	0.0634	0.0021175	0.002634	KO	NaN	0.11	0.0204	NaN	0.000255	0.00398
Hippocampus
	SC Hippocampus mean	SC Hippocampus St.Dev	SD Hippocampus mean	SD Hippocampus St.Dev.		data points sleep control (SC)			data points sleep deprivation (SD)
WT	17.18	6.1679	16.9733	6.2258	WT	20.89	20.59	10.06	17.89	10.34	22.69
HT	9.3913	1.1589	10.9533	0.5196	HT	10.1	10.02	8.054	10.71	10.6	11.55
KO	0.0593	0.0976	0.033	0.0563	KO	0.003	0.003	0.172	0	0.001	0.098
Striatum
	SC Striatum mean	SC Striatum St.Dev	SD Striatum mean	SD Striatum St.Dev.		data points sleep control (SC)			data points sleep deprivation (SD)
WT	22.1333	1.7502	17.0633	9.1366	WT	23.9	20.4	22.1	21.2	6.59	23.4
HT	9.26	1.9972	14.6667	6.2692	HT	6.98	10.7	10.1	11.3	21.9	10.8
KO	0.0403	0.0544	0.003	0.0043589	KO	0.006	0.012	0.103	0.001	0	0.008
