# Supplementary material for: Cerebral mGluR5 availability contributes to elevated sleep need and behavioral adjustment after sleep deprivation
Source: eLife. 2017 Oct 5;6:e28751. doi: 10.7554/eLife.28751 (PMC5644949; doi:10.7554/eLife.28751)
Supplement: Figure 6—source data 1. [file elife-28751-fig6-data1.xlsx]

## Sheet: Sheet1
Panel A-C
time point	mean acdiff1 WT NREM	SEM_N	mean acdiff1 WT REM	SEM_R	mean acdiff1 WT Wake	SEM_W		mean acdiff1 HT NREM	SEM_N	mean acdiff1 HT REM	SEM_R	mean acdiff1 HT Wake	SEM_W		mean acdiff1 KO NREM	SEM_N	mean acdiff1 KO REM	SEM_R	mean acdiff1 KO Wake	SEM_W
6	0	0	0	0	0	0		0	0	0	0	0	0		0	0	0	0	0	0
7	-1.35833	3.68388	-1.40833	1.02423	2.76667	4.57148		5.84167	2.75174	1.34583	0.82397	-7.1875	3.08984		2.03333	3.42009	0.225	0.905489	-2.25833	4.1298
8	4.6375	2.8302	0.3875	1.2241	-5.025	3.71335		10.0625	2.55487	1.58333	0.780135	-11.6458	2.4304		7.425	2.91172	1.38333	0.858293	-8.80833	3.66544
9	8.90833	2.77551	2.51667	1.69611	-11.425	3.70854		11.4458	2.42826	2.20417	1.15792	-13.65	2.80715		19.6208	2.55286	2.99583	1.26151	-22.6167	3.40108
10	14.2167	3.36598	4.9625	1.45446	-19.1792	4.1469		18.2583	2.48182	2.25417	1.47207	-20.5125	3.11223		22.7083	4.08929	2.94167	1.36845	-25.65	5.02147
11	13.525	4.55326	6.64167	1.66082	-20.1667	4.75298		19.5625	3.7711	3.35833	1.30068	-22.9208	3.9375		26.8375	2.38833	3.94583	1.03477	-30.7833	2.571
12	15.6375	4.68336	8.39167	1.7872	-24.0292	4.87885		21.625	4.12556	4.66667	1.40311	-26.2917	4.66224		29.4375	2.91887	5.37917	1.29673	-34.8167	3.39715
13	20.9125	5.30065	9.27917	1.53196	-30.1917	4.62627		24.2833	3.47278	4.99167	1.53633	-29.275	4.51024		30.5125	4.06075	5.25	1.25635	-35.7625	4.41574
14	29.95	6.83611	10.7208	1.44395	-40.6708	6.46697		27.725	4.75719	5.65833	1.57996	-33.3833	5.79793		31.0125	4.99618	5.54167	1.12678	-36.5542	5.0443
15	30.4583	6.09266	11.3875	1.41594	-41.8458	6.03559		34.4583	6.00289	7.37083	1.84043	-41.8292	7.56026		23.4917	7.05647	5.15833	0.981228	-28.65	6.93394
16	40.7875	6.0039	13.2625	1.30313	-54.05	6.16184		39.1375	5.02683	8.83333	1.85475	-47.9708	6.55677		20.0667	7.8951	5.25833	0.908661	-25.325	7.65225
17	44.3208	7.1999	14.65	1.55445	-58.9708	7.48777		49.4208	7.82508	11.1375	2.51164	-60.5583	10.2857		13.8458	10.1138	5.20833	0.861587	-19.0542	10.1455
18	46.5458	7.48744	16.4917	1.63047	-63.0375	8.05571		56.7542	10.535	12.8958	2.87943	-69.65	13.2724		7.83333	9.55992	4.85	0.854447	-12.6833	9.51281
19	52.5833	9.34687	19.2542	0.915929	-71.8375	8.66955		54.8583	8.05712	12.9708	2.65032	-67.8292	10.5465		0.679167	9.82312	4.48333	1.07186	-5.1625	9.8853
20	50.2875	10.39	21.3875	1.40279	-71.675	10.8907		48.5375	9.5567	13.0083	3.20356	-61.5458	12.5311		-7.00417	12.8116	3.75833	1.16867	3.24583	13.1172
21	58.4875	10.6833	24.1667	1.93004	-82.6542	11.1905		58.5083	8.40835	16.1417	3.3855	-74.65	11.5897		-10.0667	13.2001	4.15417	1.06654	5.9125	13.4283
22	63.8917	10.1538	26.1	1.89367	-89.9917	10.4978		61.6042	5.80256	17.15	2.97046	-78.7542	8.30599		-8.06667	10.201	4.53333	1.28475	3.53333	10.2589
23	64.375	9.91421	26.8792	1.77786	-91.2542	10.0613		61.2083	8.75726	17.2333	3.08294	-78.4417	11.0623		-21.3083	11.2882	3.47083	1.30011	17.8375	11.468
24	56.9375	10.4992	26.5292	1.62145	-83.4667	10.2535		64.7917	7.76601	17.6458	3.17513	-82.4375	10.5088		-32.1792	15.8157	2.49583	1.8711	29.6833	16.7342
Panel D - I
	NREM ZT12 mean	SEM			NREM ZT24 mean	SEM
WT	15.6375	4.6834		WT	56.9375	10.4992
HT	21.625	4.1256		HT	64.7917	7.766
KO	29.4375	2.9189		KO	-32.1792	15.8157
	REM ZT12 mean	SEM			REM ZT24 mean	SEM
WT	8.3917	1.7872		WT	26.5292	1.6215
HT	4.6667	1.4031		HT	17.6458	3.1751
KO	5.3792	1.2967		KO	2.4958	1.8711
	Wake ZT12 mean	SEM			Wake ZT24 mean	SEM
WT	-24.0292	4.8789		WT	-83.4667	10.2535
HT	-26.2917	4.6622		HT	-82.4375	10.5088
KO	-34.8167	3.3971		KO	29.6833	16.7342
