# Supplementary material for: Cerebral mGluR5 availability contributes to elevated sleep need and behavioral adjustment after sleep deprivation
Source: eLife. 2017 Oct 5;6:e28751. doi: 10.7554/eLife.28751 (PMC5644949; doi:10.7554/eLife.28751)
Supplement: Figure 7—source data 1. [file elife-28751-fig7-data1.xlsx]

## Sheet: Sheet1
Genotype	Day	Phase	Hour time course WT	SWA % WT bl	SEM WT%		Genotype	Day	Phase	Hour HT bl	SWA % HT bl	SEM HT %		Genotype	Day	Phase	Hour KO bl	SWA % KO bl	SEM KO %
WT	b1	light	0.503498	150.699	5.77887		HT	b1	light	0.707943	148.449	6.02603		KO	b1	light	0.418167	142.121	6.03786
WT	b1	light	1.37217	130.607	3.64347		HT	b1	light	1.56307	127.729	3.67		KO	b1	light	1.28294	129.304	4.77411
WT	b1	light	2.36365	124.684	4.13897		HT	b1	light	2.52624	118.791	2.70699		KO	b1	light	2.26446	123.661	4.22483
WT	b1	light	3.43064	120.578	2.22887		HT	b1	light	3.39491	117.526	3.31592		KO	b1	light	3.23146	112.847	3.26427
WT	b1	light	4.35097	113.224	2.81315		HT	b1	light	4.30982	111.949	3.48975		KO	b1	light	4.20373	112.535	2.7686
WT	b1	light	5.308	113.815	2.08673		HT	b1	light	5.30248	110.477	3.8302		KO	b1	light	5.16598	109.544	2.75796
WT	b1	light	6.24138	110.113	2.10263		HT	b1	light	6.20158	104.757	2.95175		KO	b1	light	6.07701	107.032	2.91055
WT	b1	light	7.24395	105.058	1.87124		HT	b1	light	7.19064	100.531	3.3876		KO	b1	light	7.14219	103.883	2.65308
WT	b1	light	8.21949	105.164	0.845243		HT	b1	light	8.09719	102.309	0.952083		KO	b1	light	8.13777	100.867	2.89637
WT	b1	light	9.24805	99.288	1.49797		HT	b1	light	9.02632	98.4603	2.46157		KO	b1	light	9.16464	104.046	1.54177
WT	b1	light	10.3057	102.085	1.47873		HT	b1	light	10.0294	100.241	2.13416		KO	b1	light	10.1805	98.8658	1.67328
WT	b1	light	11.3071	93.4631	1.43069		HT	b1	light	11.2099	98.9897	1.86126		KO	b1	light	11.3269	96.2212	2.39132
WT	b1	dark	14.2082	136.698	9.54933		HT	b1	dark	15.746	155.237	11.3905		KO	b1	dark	15.0846	102.167	10.1973
WT	b1	dark	16.3434	139.212	9.84308		HT	b1	dark	17.4357	146.047	12.4778		KO	b1	dark	16.9174	105.06	14.4666
WT	b1	dark	18.123	146.194	8.89876		HT	b1	dark	18.9637	151.011	8.01454		KO	b1	dark	18.6855	115.616	9.43448
WT	b1	dark	19.5507	141.18	9.11429		HT	b1	dark	20.05	138.338	7.77969		KO	b1	dark	20.3999	134.632	5.9521
WT	b1	dark	20.9646	131.493	8.04829		HT	b1	dark	21.0728	138.212	7.6377		KO	b1	dark	21.5926	135.927	5.57131
WT	b1	dark	22.9209	150.912	6.83552		HT	b1	dark	22.615	142.082	8.91831		KO	b1	dark	22.7722	132.897	8.75687
WT	b2	light	24.5006	148.487	5.64407		HT	b2	light	24.4703	147.099	5.8211		KO	b2	light	24.433	140.104	8.54871
WT	b2	light	25.4061	128.311	3.46399		HT	b2	light	25.4532	138.738	6.61191		KO	b2	light	25.3267	130.096	5.33422
WT	b2	light	26.4212	118.609	2.31573		HT	b2	light	26.5535	129.847	5.22648		KO	b2	light	26.2896	123.123	5.26234
WT	b2	light	27.402	111.793	3.50694		HT	b2	light	27.5622	121.539	4.33415		KO	b2	light	27.1786	117.514	4.78045
WT	b2	light	28.385	113.906	2.72992		HT	b2	light	28.4133	114.402	4.73719		KO	b2	light	28.2506	111.067	2.70327
WT	b2	light	29.4652	113.244	4.65196		HT	b2	light	29.4826	118.071	3.32873		KO	b2	light	29.2958	111.019	5.63072
WT	b2	light	30.3497	111.007	3.17149		HT	b2	light	30.5043	110.378	2.25513		KO	b2	light	30.2835	105.735	2.79147
WT	b2	light	31.3161	105.451	3.19168		HT	b2	light	31.3764	103.469	2.35876		KO	b2	light	31.2739	103.557	3.29808
WT	b2	light	32.3261	102.234	1.68593		HT	b2	light	32.3415	105.46	1.53653		KO	b2	light	32.2302	104.892	1.9819
WT	b2	light	33.2763	99.3186	1.51669		HT	b2	light	33.1909	101.592	2.92819		KO	b2	light	33.2482	98.7968	1.95011
WT	b2	light	34.2629	101.262	1.81049		HT	b2	light	34.186	97.8053	1.35016		KO	b2	light	34.2379	95.9842	1.77529
WT	b2	light	35.3359	97.185	1.9912		HT	b2	light	35.2617	95.1422	1.31909		KO	b2	light	35.3793	100.327	1.79283
WT	b2	dark	39.1206	159.59	13.4002		HT	b2	dark	38.9184	143.108	3.7033		KO	b2	dark	39.3068	118.156	11.1819
WT	b2	dark	41.3297	169.008	11.1856		HT	b2	dark	41.3446	155.038	8.46557		KO	b2	dark	41.0888	130.087	9.85256
WT	b2	dark	42.7866	163.627	10.5913		HT	b2	dark	43.1391	156.182	4.49011		KO	b2	dark	42.3834	127.569	11.2878
WT	b2	dark	43.9823	151.632	8.69954		HT	b2	dark	43.9949	147.371	4.64149		KO	b2	dark	43.5132	125.179	10.5242
WT	b2	dark	45.1744	133.512	5.47579		HT	b2	dark	44.974	133.081	6.43287		KO	b2	dark	45.486	133.039	9.5362
WT	b2	dark	47.1032	163.237	7.62895		HT	b2	dark	46.3109	145.248	5.60294		KO	b2	dark	46.6708	138.013	9.69395
WT	r1	light	54.5109	230.4	12.6108		HT	r1	light	54.2958	199.156	8.63848		KO	r1	light	54.5344	169.3	18.2729
WT	r1	light	55.0821	173.85	9.2426		HT	r1	light	54.8971	147.204	5.30867		KO	r1	light	55.1832	135.25	13.0581
WT	r1	light	55.7477	149.6	8.11664		HT	r1	light	55.6078	136.959	4.5706		KO	r1	light	55.8101	126.095	13.0449
WT	r1	light	56.4646	136.28	6.81893		HT	r1	light	56.252	121.503	3.82328		KO	r1	light	56.4643	119.275	12.6467
WT	r1	light	57.1908	122.96	5.5561		HT	r1	light	56.9862	114.108	4.09944		KO	r1	light	57.1619	108.82	11.584
WT	r1	light	57.91	113.96	4.91613		HT	r1	light	57.7015	109.702	4.54754		KO	r1	light	57.905	103.294	12.0166
WT	r1	light	58.6746	110.03	4.86101		HT	r1	light	58.5015	101.367	3.46577		KO	r1	light	58.6425	101.085	11.4628
WT	r1	light	59.4971	106.48	4.7212		HT	r1	light	59.409	103.602	3.92133		KO	r1	light	59.5292	100.132	10.9868
WT	r1	dark	61.7354	129.89	8.51101		HT	r1	dark	62.407	128.149	5.31414		KO	r1	dark	63.3315	99.3546	11.7534
WT	r1	dark	63.9419	134.6	7.10688		HT	r1	dark	64.2482	125.053	4.66513		KO	r1	dark	64.5508	115.921	10.5954
WT	r1	dark	65.6762	132.54	9.77135		HT	r1	dark	66.215	123.65	7.41701		KO	r1	dark	65.4635	109.324	9.66595
WT	r1	dark	67.2351	131.45	7.03782		HT	r1	dark	67.5382	117.64	3.98905		KO	r1	dark	66.8938	117.256	15.8338
WT	r1	dark	68.5713	118.61	6.00036		HT	r1	dark	69.0334	117.463	3.99438		KO	r1	dark	68.0283	120.817	19.0742
WT	r1	dark	70.1027	123.61	7.31439		HT	r1	dark	70.3252	114.498	4.12452		KO	r1	dark	69.6962	112.137	18.8954
