# Supplementary material for: Cerebral mGluR5 availability contributes to elevated sleep need and behavioral adjustment after sleep deprivation
Source: eLife. 2017 Oct 5;6:e28751. doi: 10.7554/eLife.28751 (PMC5644949; doi:10.7554/eLife.28751)
Supplement: Figure 8—source data 1. [file elife-28751-fig8-data1.xlsx]

## Sheet: Sheet1
Panel A-C
	all conditions mean [% SAB]	SEM	sleep control mean [% SAB]	SEM	sleep deprivation mean [% SAB]	SEM
WT	56.9913	1.49	60.3639	1.2	54.1005	2.0459
HT	56.6357	1.26	56.6492	1.9	56.6237	1.7836
KO	51.5523	1.64	49.9906	1.81	52.4893	2.4166
Panel D
Run	WT SC mean [Entries count]	SEM	WT SD mean [Entries count]	SEM	HT SD mean [Entries count]	SEM	HT SD mean [Entries count]	SEM	KO SD mean [Entries count]	SEM	KO SD mean [Entries count]	SEM
1	62	2.2657	59.8571	2.0287	52.375	2.9637	58.1111	3.7433	46.5	2.4597	51	3.6086
2	36.5	3.7036	40.7143	2.2542	35.25	3.0808	44	4.16	30.3333	4.8212	46.2	5.2085
3	38.3333	3.4221	47.7143	4.1099	37.625	2.1871	47.4444	2.062	30.5	4.0062	51.7	5.4895
Panel E-G
	run Δ2 [Δ Entries]	SEM	run Δ3 [Δ Entries]	SEM
WT	-22.08	2.63	-17.46	2.96		sleep control [Δ Entries]	SEM	sleep deprivation [Δ Entries]	SEM
HT	-15.53	2.29	-12.59	2.65	run Δ2	-19.35	2.12	-11.88	2.37
KO	-9.06	3.05	-5.56	3.77	run Δ3	-17.8	2.37	-6.69	2.54
