# Supplementary material for: Cerebral mGluR5 availability contributes to elevated sleep need and behavioral adjustment after sleep deprivation
Source: eLife journal article supplement (doi:10.7554/elife.28751), 2017-10-05
Supplement: supp [file elife_poa_e28751_Figure_2_figure_supplement_1.docx]

**Figure 2 - figure supplement 1.** Individual change in mGluR5 availability as a function of baseline mGluR5 expression.

*
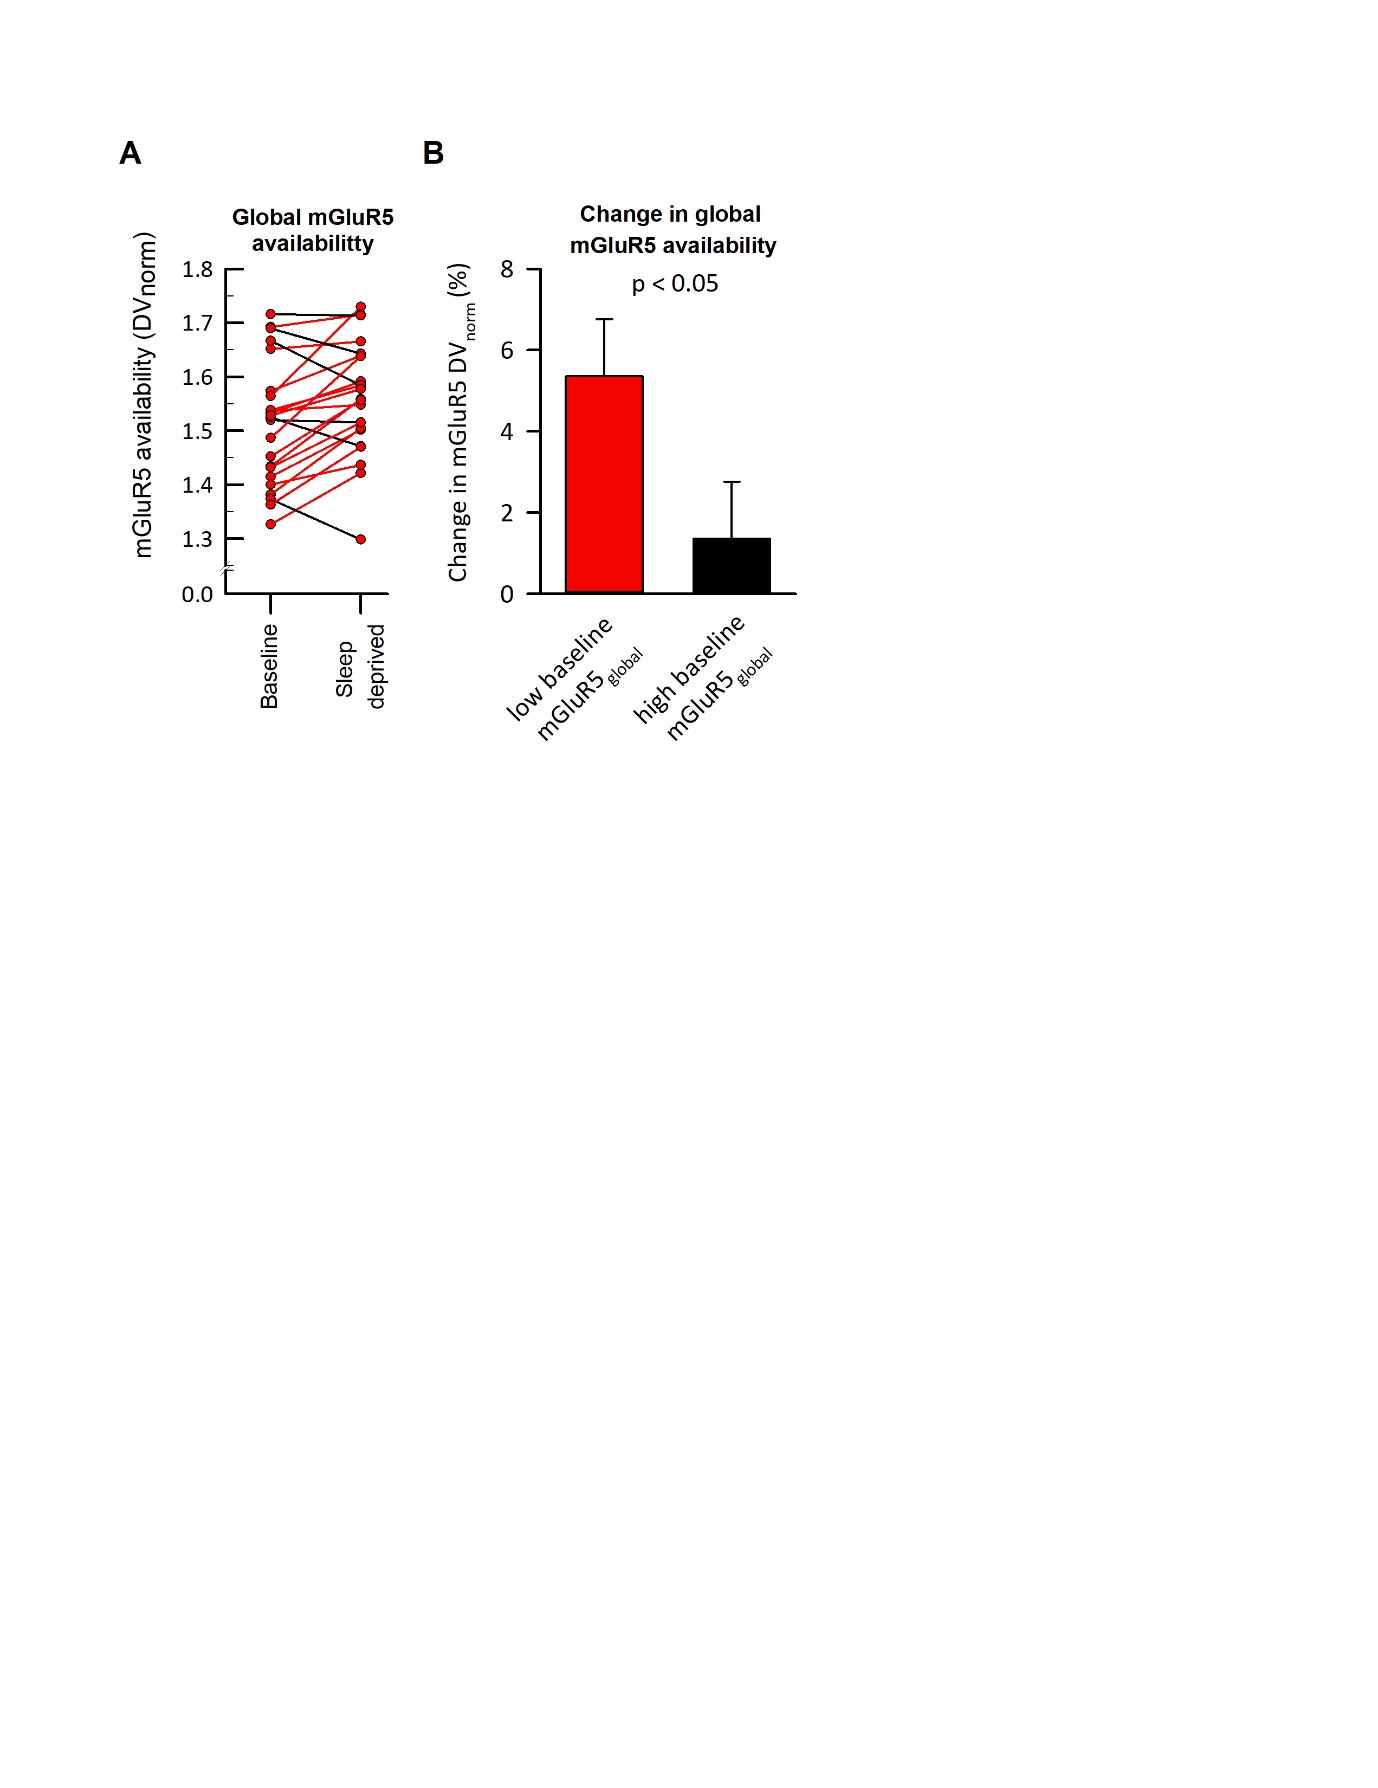
*

**A**. The individual global mGluR5 availability at baseline and sleep deprivation. **B**. The change in mGluR5 by sleep deprivation, plotted as the median split by the subjects with either low (n=11) or high (n=12) global mGluR5 availability at baseline. Statistics: two-sided t-test (t21= -2.18).
