# Supplementary material for: Cerebral mGluR5 availability contributes to elevated sleep need and behavioral adjustment after sleep deprivation
Source: eLife journal article supplement (doi:10.7554/elife.28751), 2017-10-05
Supplement: supp [file elife_poa_e28751_Figure_2_figure_supplement_2.docx]

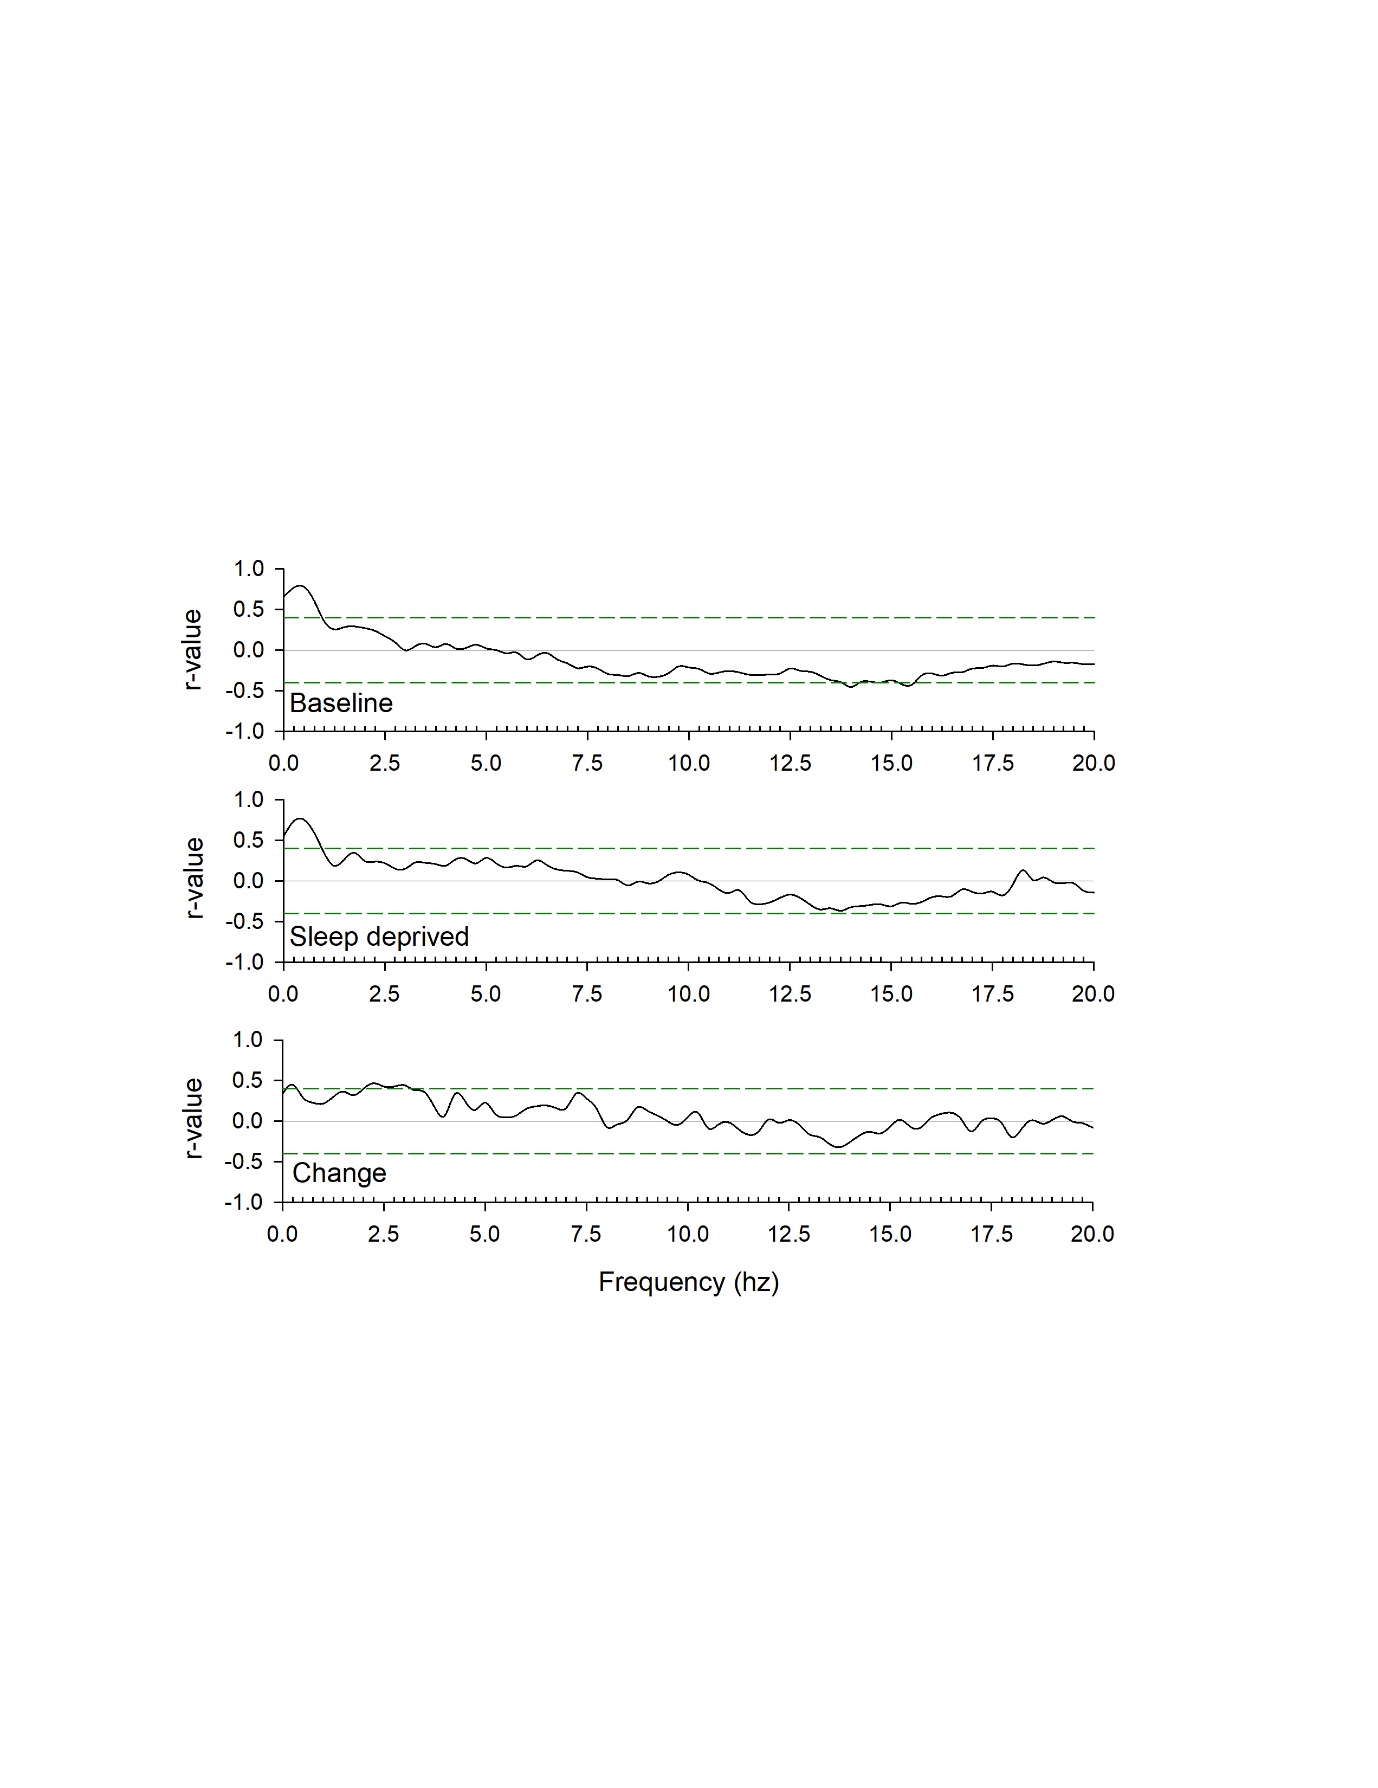
**Figure 2 - figure supplement 2.** Spearman rank correlation coefficients between global mGluR5 availability and EEG power between 0-20 Hz in baseline and sleep deprivation conditions, and the change caused by sleep loss.

The green lines indicate r-values that are above (or below) the α < 0.05 significance threshold.
