# Supplementary material for: Cerebral mGluR5 availability contributes to elevated sleep need and behavioral adjustment after sleep deprivation
Source: eLife journal article supplement (doi:10.7554/elife.28751), 2017-10-05
Supplement: supp [file elife_poa_e28751_Figure_2_figure_supplement_3.docx]

**Figure 2 - figure supplement 3.** Enhanced rebound after sleep deprivation in EEG delta (0.5-4.5 Hz) and < 1 Hz activity and in individuals with high change in mGluR5 availability after sleep deprivation.

***
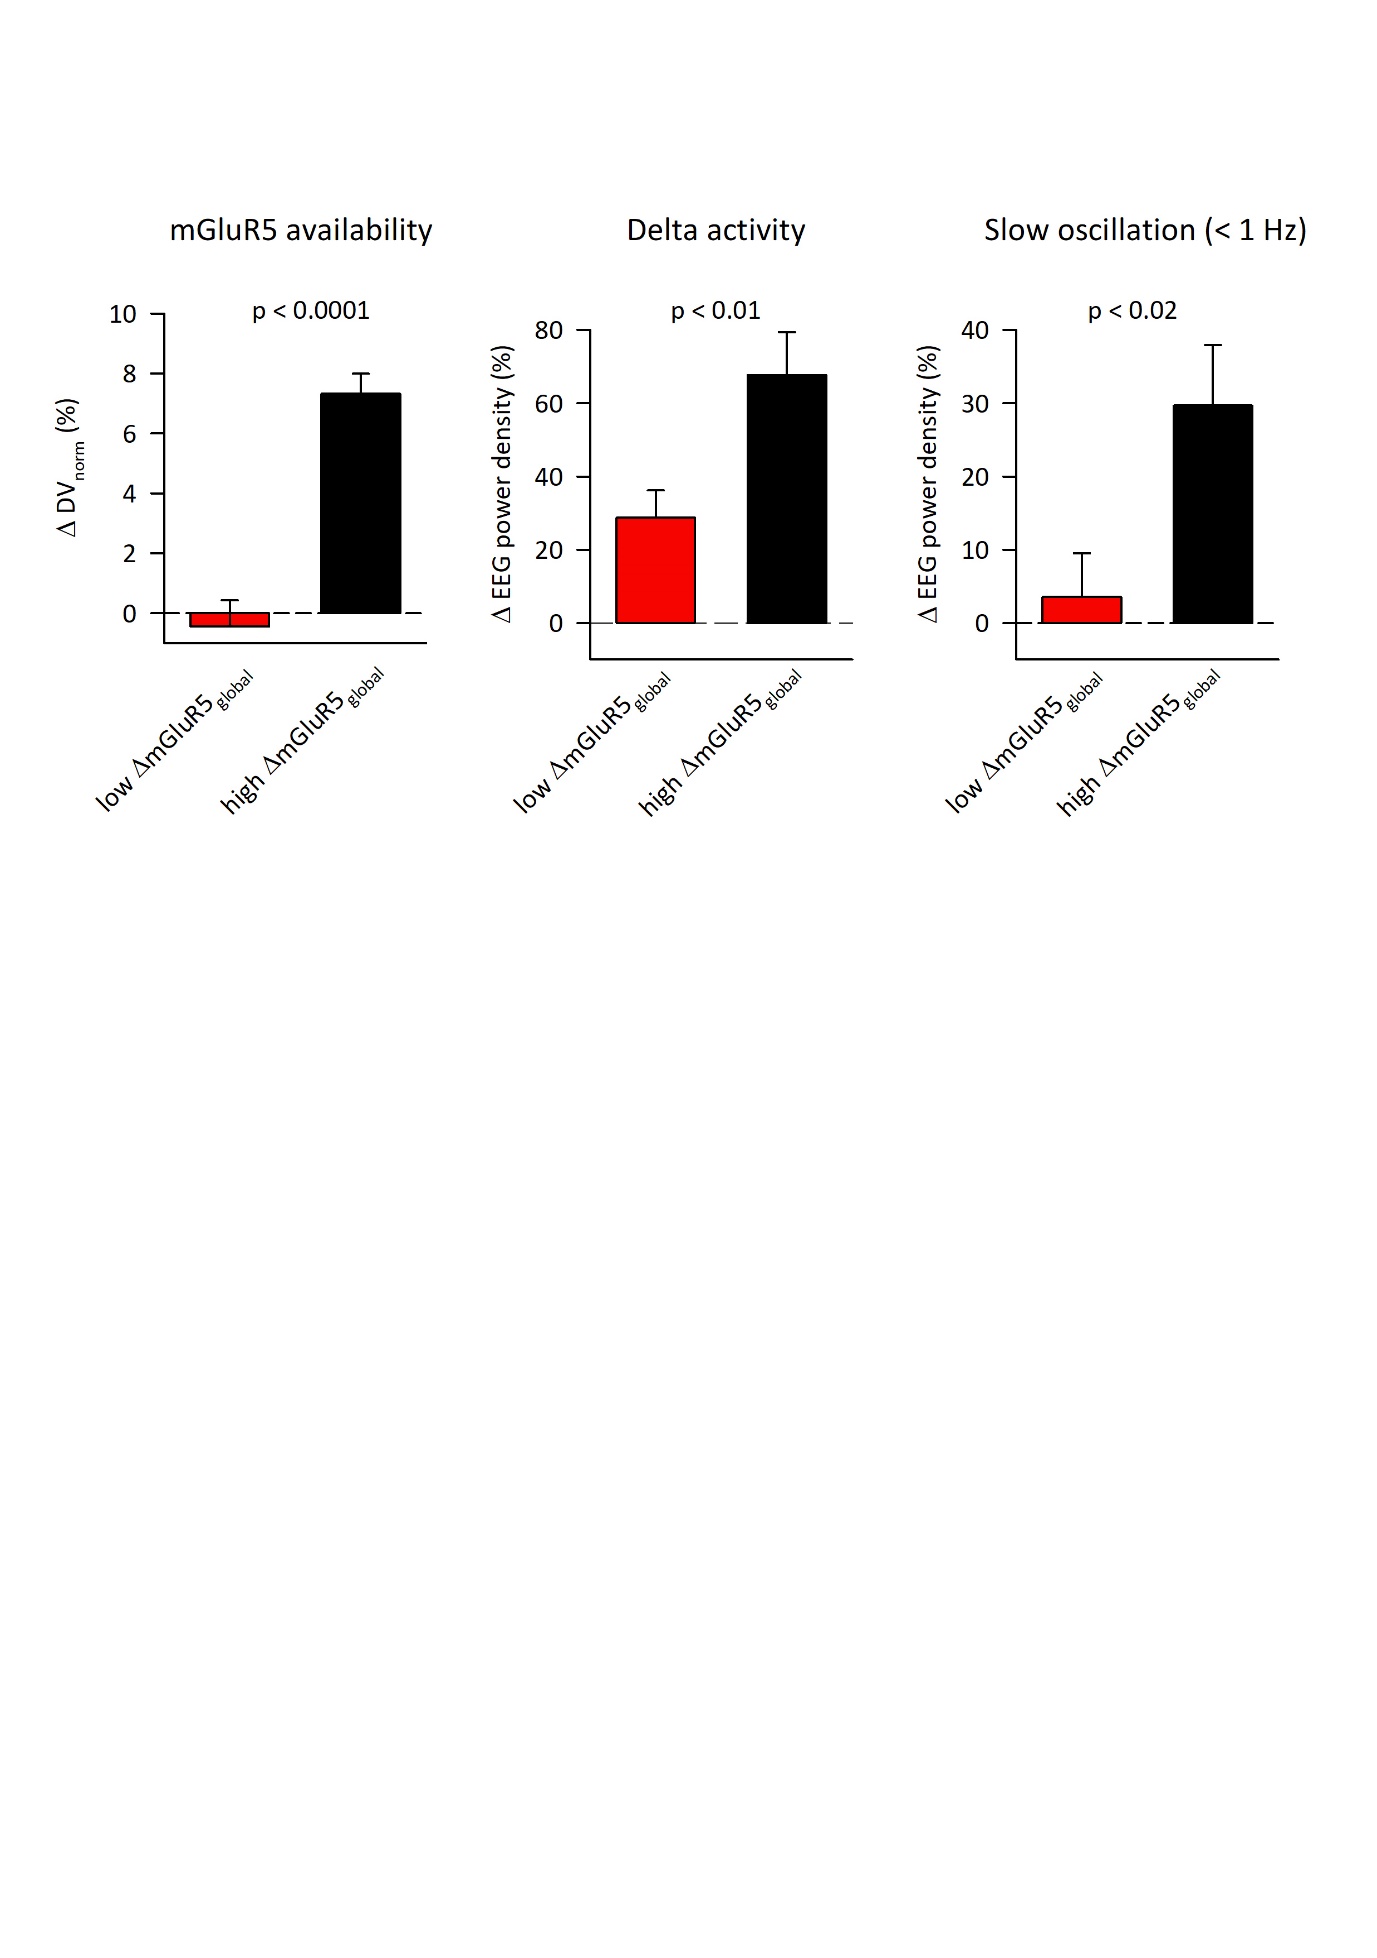
***

Global mGluR5 and EEG data, quantified in NREM sleep episode 1. Red bars: low mGluR5 responder group (n = 12); black bars: high mGluR5 responder group (n = 11). Data represent means ± SEM. P-values were derived from 2-tailed Student’s t-tests following a significant ‘condition’ x ‘group’ interaction of a two-way ANOVA (F1,21 > 6.85, pall < 0.02).
