# Supplementary material for: Cerebral mGluR5 availability contributes to elevated sleep need and behavioral adjustment after sleep deprivation
Source: eLife journal article supplement (doi:10.7554/elife.28751), 2017-10-05
Supplement: supp [file elife_poa_e28751_Figure_3_figure_supplement_1.docx]

**Figure 3 - figure supplement 1.** Correlations between EEG power bands and regional mGluR5 availability.

***
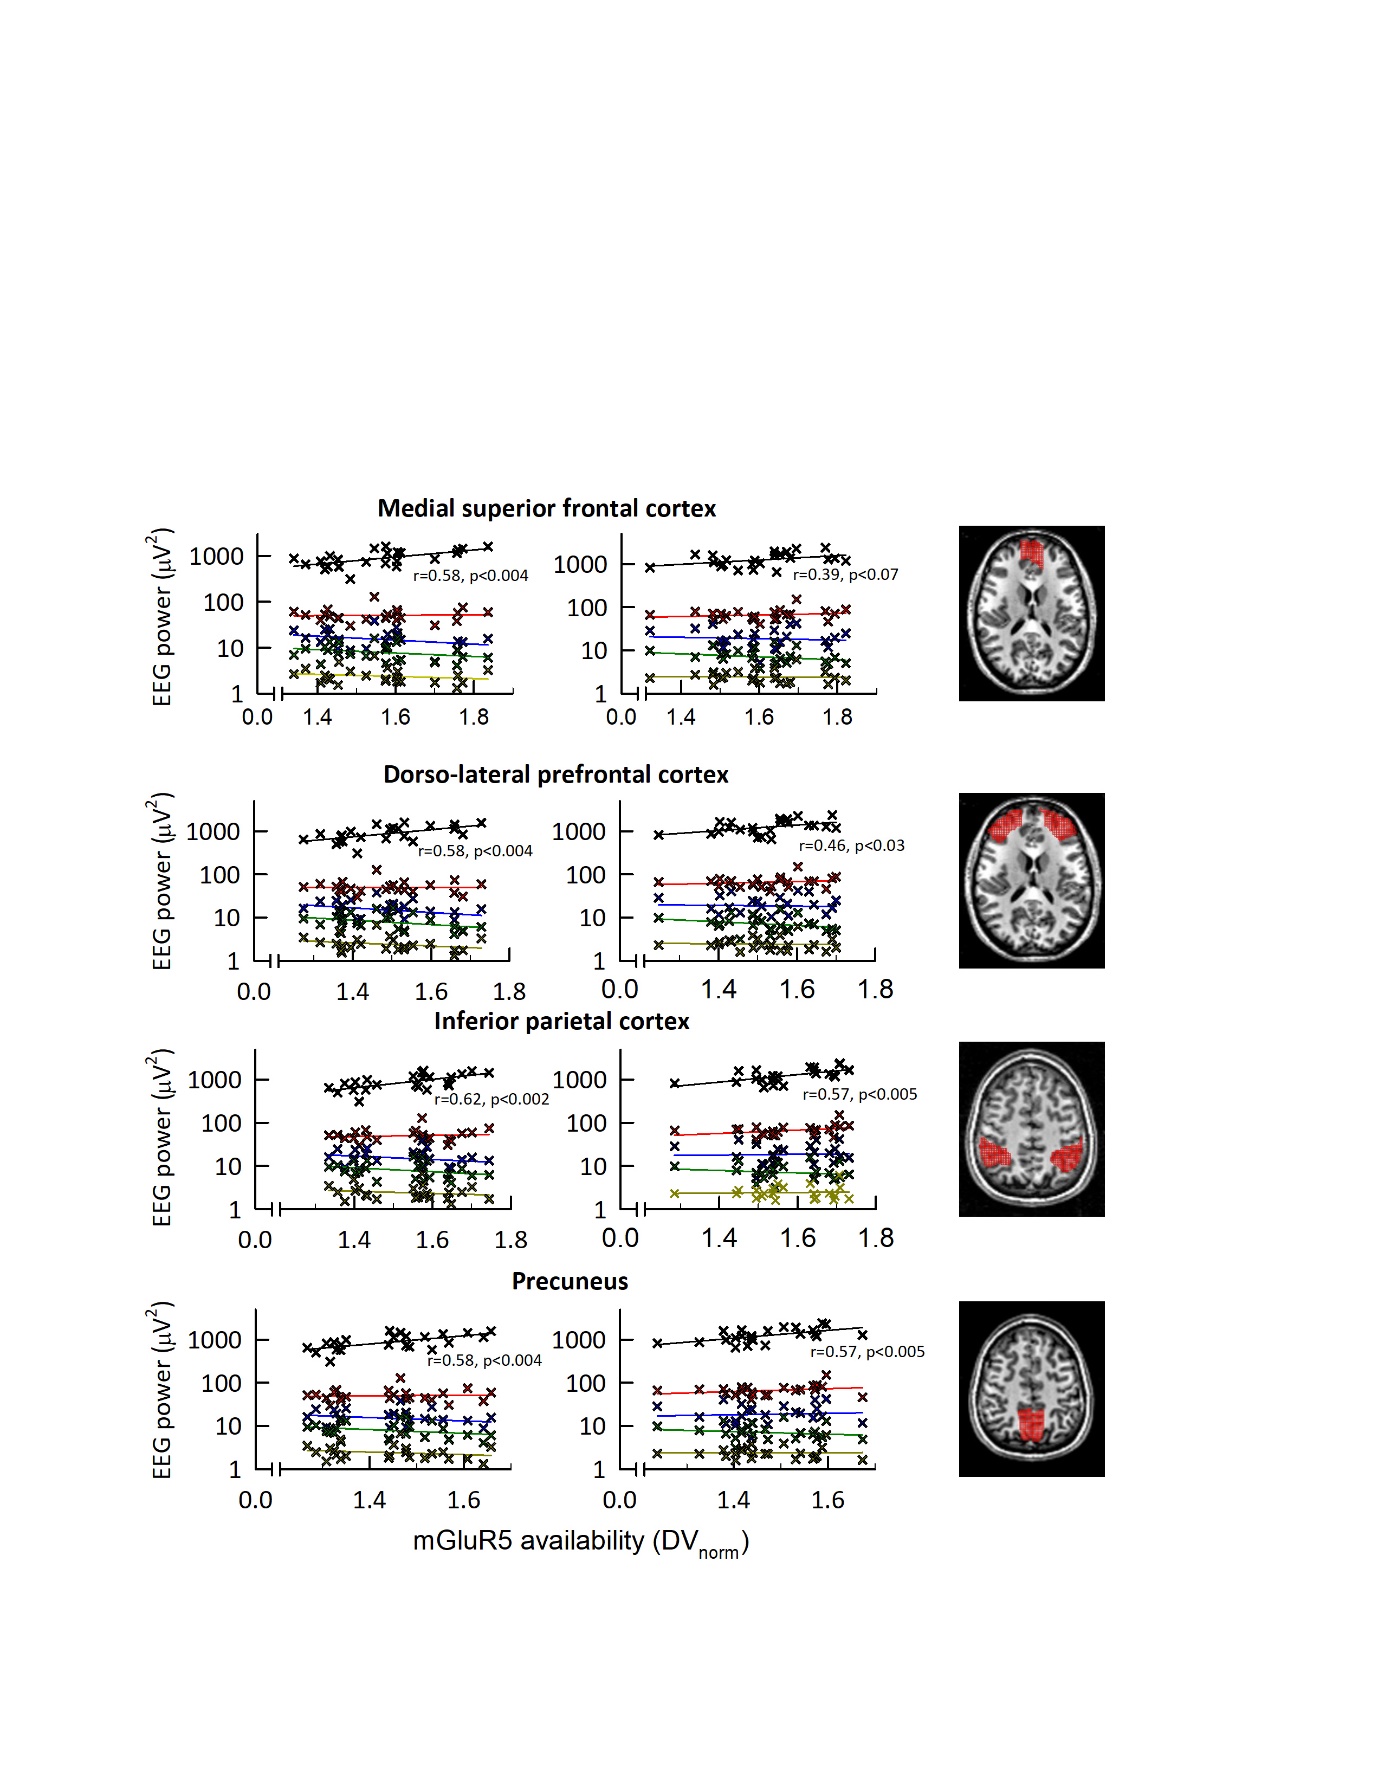
***

EEG power (C3M2 derivation) on a logarithmic scale for delta (0.5 - 4.5 Hz; black), theta (4 - 8 Hz; red), alpha (8 - 12 Hz; blue), sigma (12 - 15 Hz; green) and beta (15 - 20 Hz; yellow) ranges in the first NREM sleep episode of sleep control (left) and sleep deprivation (middle) conditions. Spearman rank correlation coefficients (r) and p-values of significant correlations are presented. Regions and right column are the same as in Fig. 3.
