# Supplementary material for: Cerebral mGluR5 availability contributes to elevated sleep need and behavioral adjustment after sleep deprivation
Source: eLife journal article supplement (doi:10.7554/elife.28751), 2017-10-05
Supplement: supp [file elife_poa_e28751_Figure_6_figure_supplement_2.docx]

**Figure 6 - figure supplement 2.** Duration of vigilance states in mGluR5 KO, HT and WT mice at baseline and recovery light and dark phases.


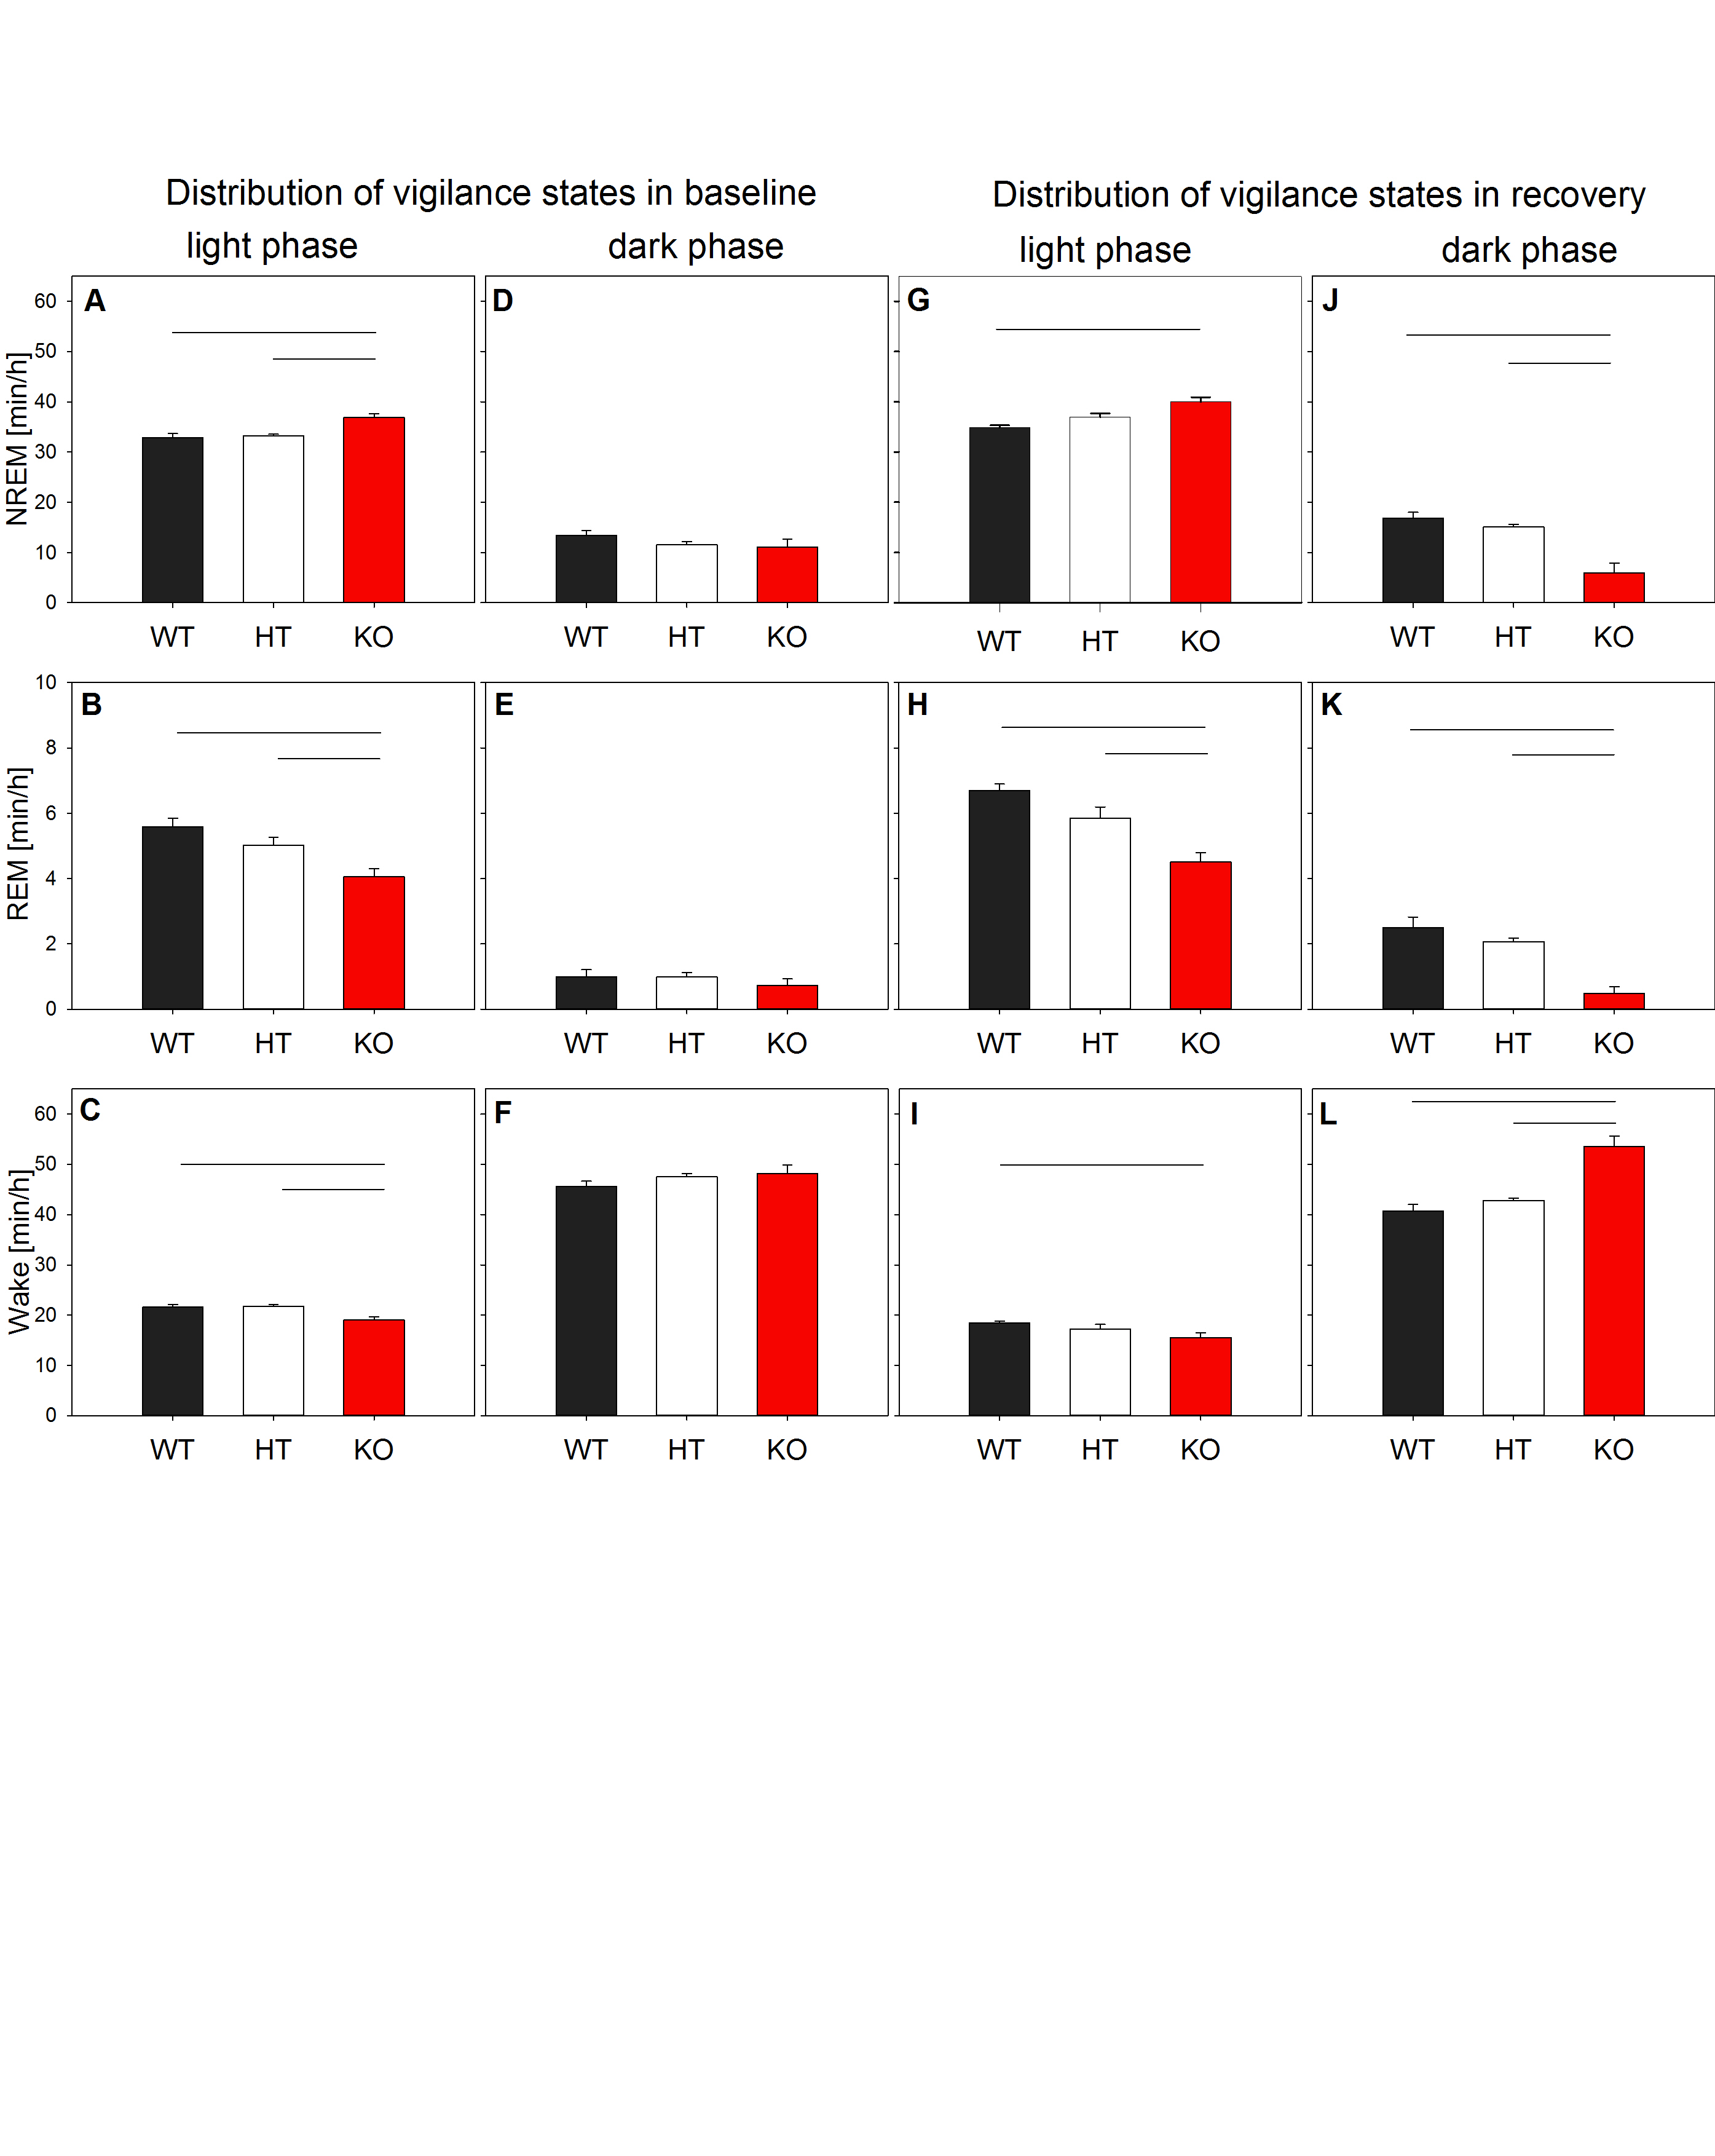


Mean amount of NREM sleep, REM sleep and wakefulness over the 12-hour light and 12-hour dark phase of baseline mean (left panel, A – F) and the 6-hour light and 12-hour dark phase of recovery (right panel, G – L ). During the baseline light period, KO mice show slightly more NREM sleep and slightly less REM sleep and wakefulness than their littermates (A-C). No significant differences in the dark phase were observed (D -E). During the light phase of recovery, KO mice show slightly more NREM sleep and slightly less REM sleep and wakefulness than their WT littermates (G – I). In the dark phase, KO spent less time in NREM and REM sleep than their littermates and more time in wakefulness (J – L). Statistics represent Holm corrected t-tests (lines), following significant ‘genotype x hour’ interactions or ‘genotype’ effect in overall 2-way ANOVAs (pall < 0.03 for WT *vs.* KO and HT *vs.* KO). Data represent means + SEM in n=8 mice/genotype.
