# Supplementary material for: Cerebral mGluR5 availability contributes to elevated sleep need and behavioral adjustment after sleep deprivation
Source: eLife journal article supplement (doi:10.7554/elife.28751), 2017-10-05
Supplement: supp [file elife_poa_e28751_Figure_8_figure_supplement_1.docx]

**Figure 8 - figure supplement 1.** Change of exploratory activity across trials.


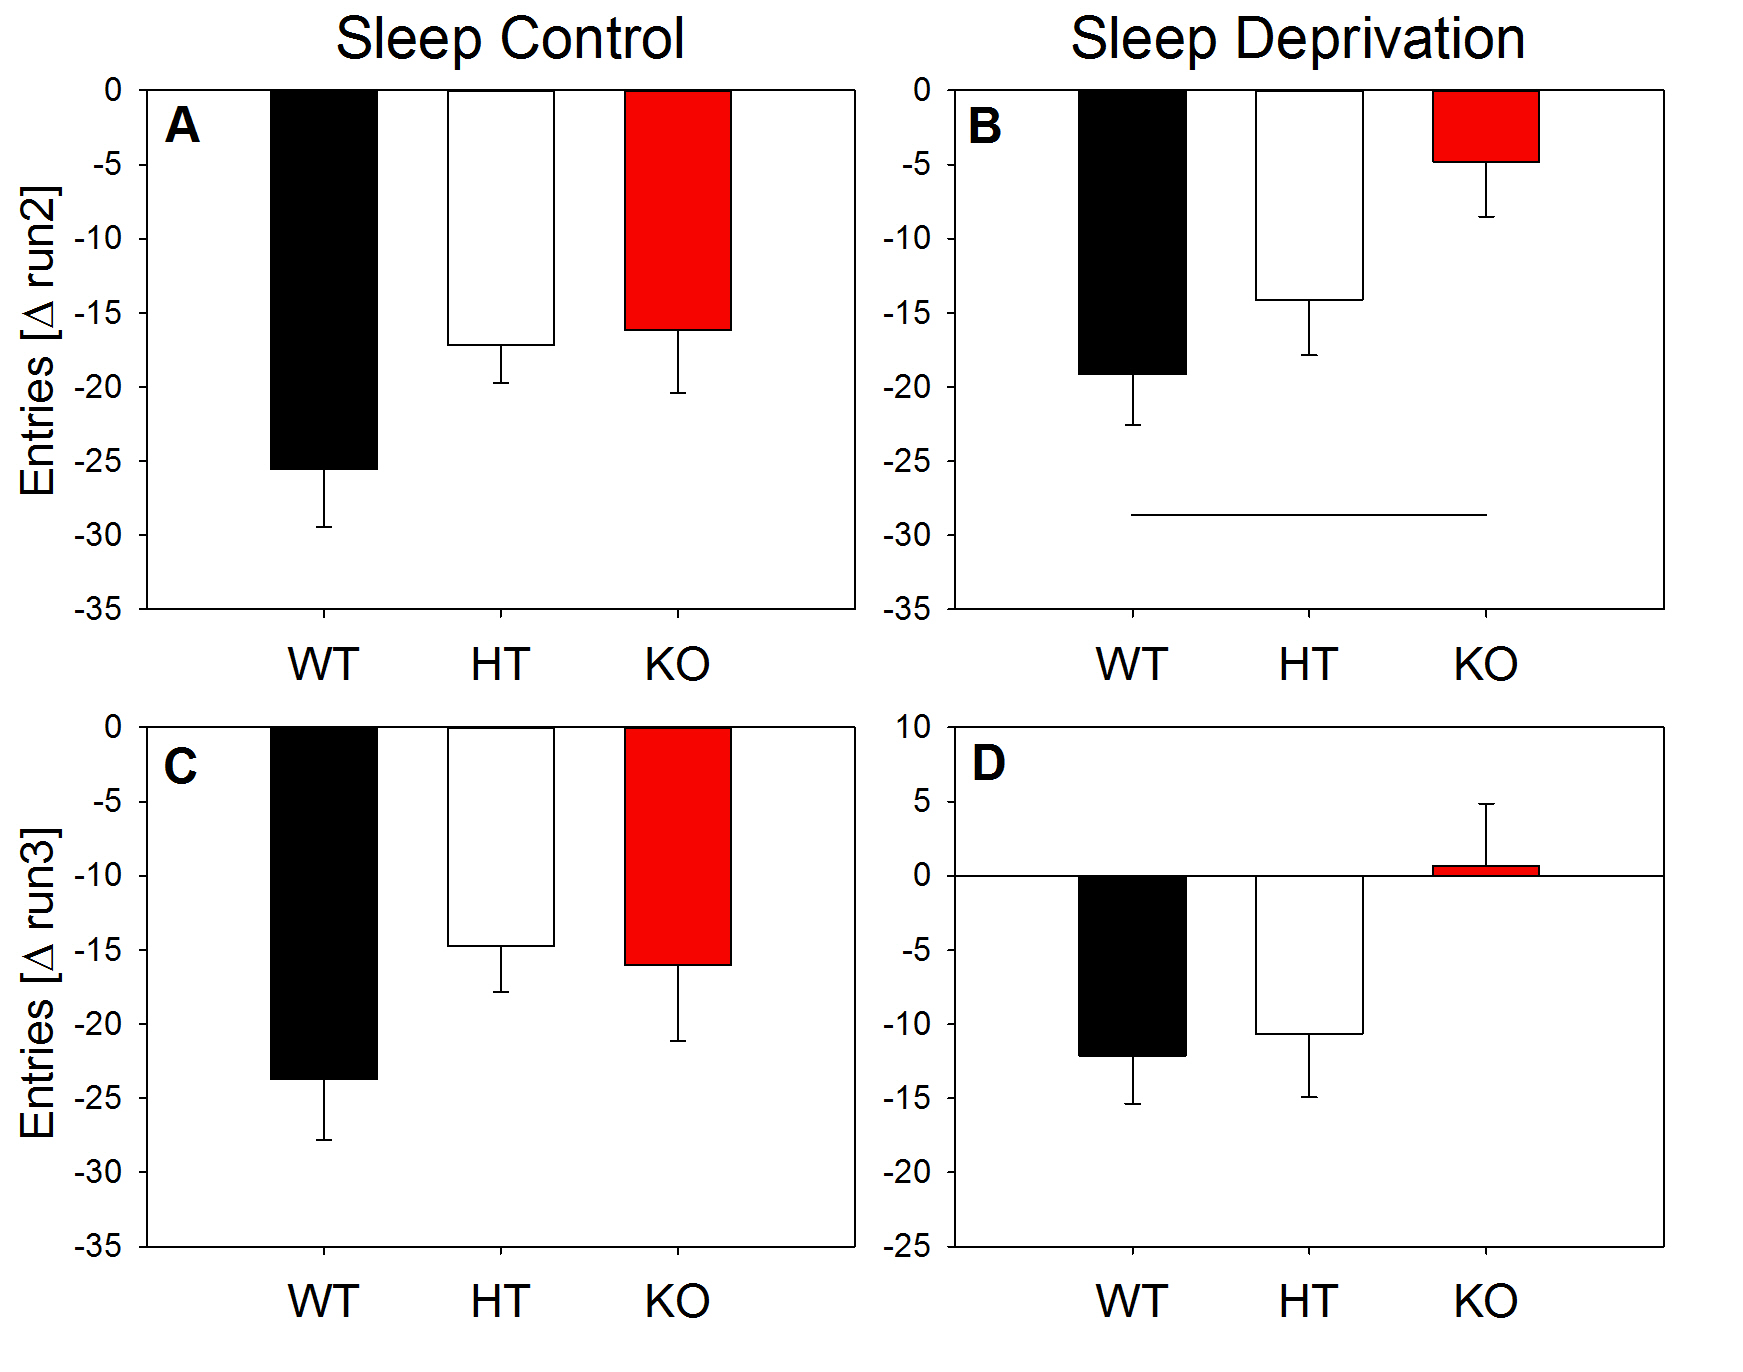


Number of entries relative to the first maze exposure. The observed overall genotype effect (Fig. 7) is restricted to the sleep deprivation condition. Main effect of ‘genotype’ in one-way ANOVA: control condition: Δrun2 and Δrun3: F2,17 > 2, pall > 0.1; sleep deprivation condition: Δrun2: F2,23 = 3.8, p < 0.04; Δrun3: F2,23 = 3.1, p = 0.06. the horizontal line indicates the significant difference between WT and KO animals (p < 0.05; Holm-corrected t-test).
